# Supplementary material for: Tuning polaronic redox behavior in olivine phosphate
Source: Royal Society of Chemistry journal article supplement (doi:10.1039/c8cp06083e), 2019-01-01
Supplement: c8cp06083e1.pdf [file c8cp06083e1.pdf]

Supporting Information for

# **Tuning polaronic redox behavior in Olivine phosphate**

Yue Gu, Mouyi Weng, Gaofeng Teng, Hua Zeng, Jianshu Jie, Weiji Xiao, Jiaxin  
Zheng\*, and Feng Pan\*

School of Advanced Materials, Peking University, Shenzhen Graduate School, Shenzhen  
518055, People's Republic of China

\*Corresponding authors: J. Z. ([zhengjx@pkusz.edu.cn](mailto:zhengjx@pkusz.edu.cn)) and F. P. ([panfeng@pkusz.edu.cn](mailto:panfeng@pkusz.edu.cn))

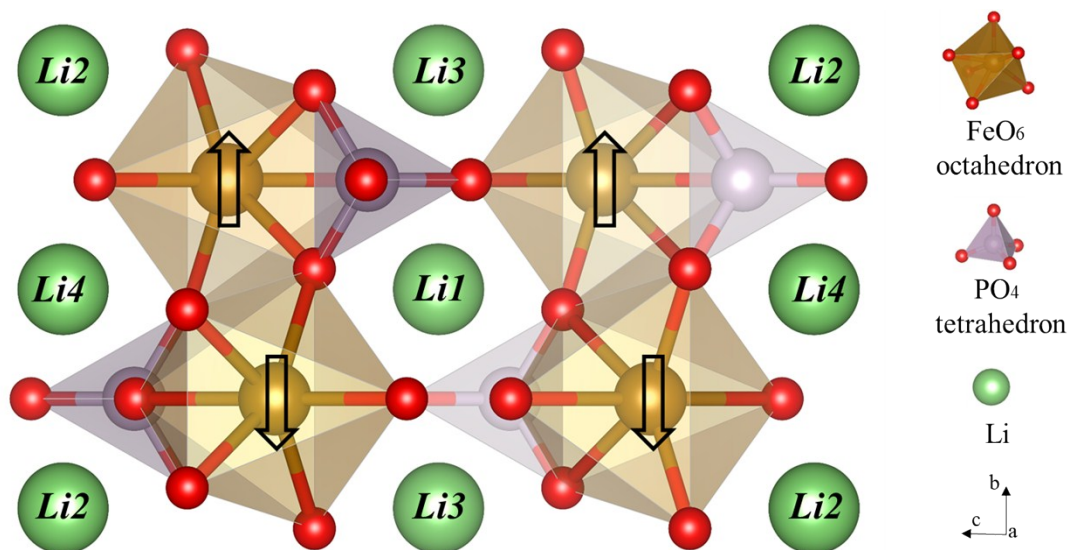

**Fig. S1** The direction of the magnetic moment of each Fe ion in the  $\text{LiFePO}_4$  cell.

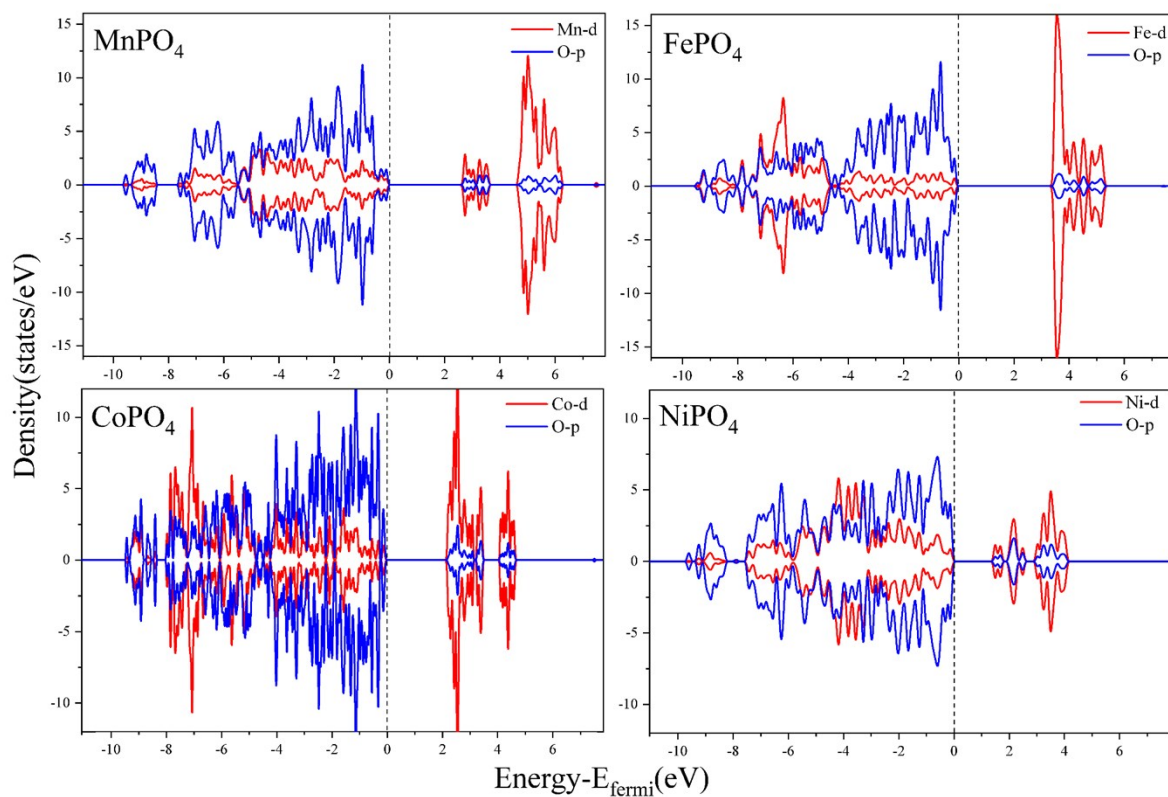

**Fig. S2** The HSE06 calculated partial density of states of  $\text{MPO}_4$  ( $M = \text{Mn, Fe, Co, Ni}$ ).

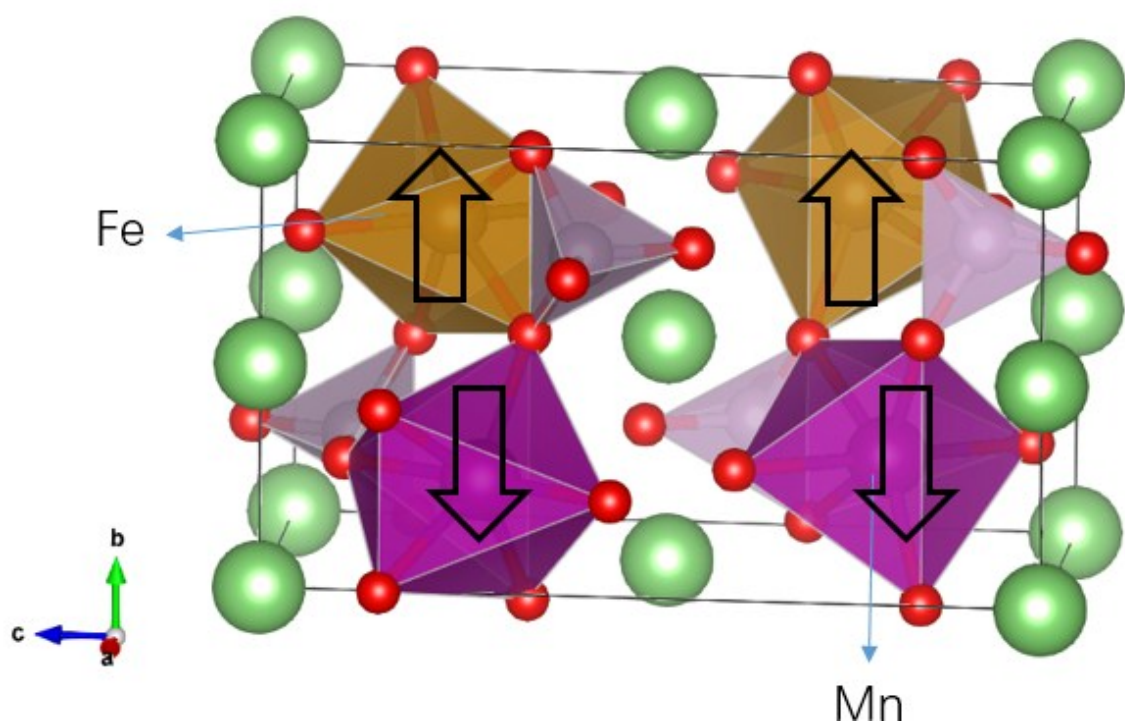

**Fig. S3** The  $\text{LiFe}_{0.5}\text{Mn}_{0.5}\text{PO}_4$  cell which has the lowest energy (antiferromagnetic conditions).

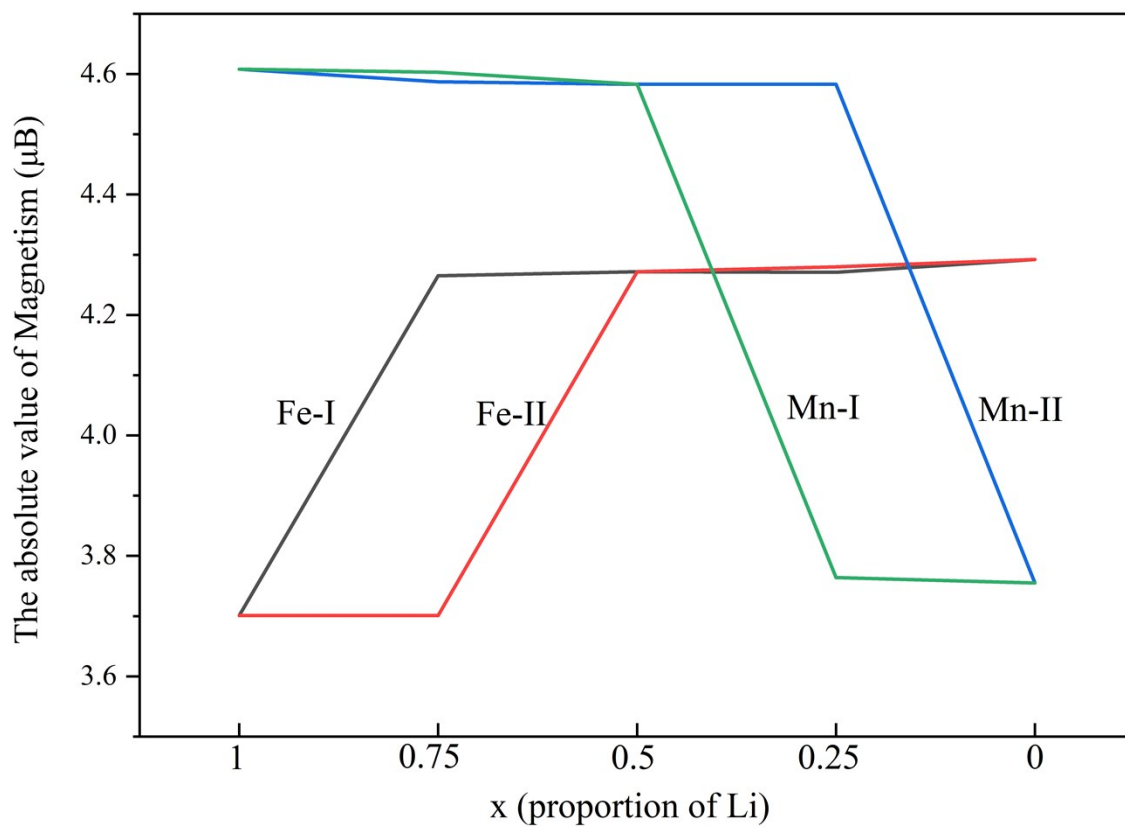

**Fig. S4** The absolute value of calculated magnetic moments of four transition metal ions in  $\text{Li}_x\text{Fe}_{0.5}\text{Mn}_{0.5}\text{PO}_4$  ( $x = 1, 0.75, 0.5, 0.25, 0$ ).

**Tab. S1** The calculated magnetic moments of four Fe ions in  $\text{Na}_x\text{FePO}_4$  ( $x = 1, 0.75, 0$ )

|                                 | <b>Fe-I</b> | <b>Fe-II</b> | <b>Fe-III</b> | <b>Fe-IV</b> |
|---------------------------------|-------------|--------------|---------------|--------------|
| $\text{NaFePO}_4$               | 3.702       | -3.702       | 3.702         | -3.702       |
| $\text{Na}_{0.75}\text{FePO}_4$ | 3.706       | -3.707       | 3.690         | -4.262       |
| $\text{FePO}_4$                 | 4.283       | -4.283       | 4.283         | -4.283       |
